# Supplementary material for: SEPATH: benchmarking the search for pathogens in human tissue whole genome sequence data leads to template pipelines
Source: PubMed Central journal article supplement (PMC6805339; doi:10.1186/s13059-019-1819-8), 2019-10-22

# Human Depletion – Bacterial Read Removal

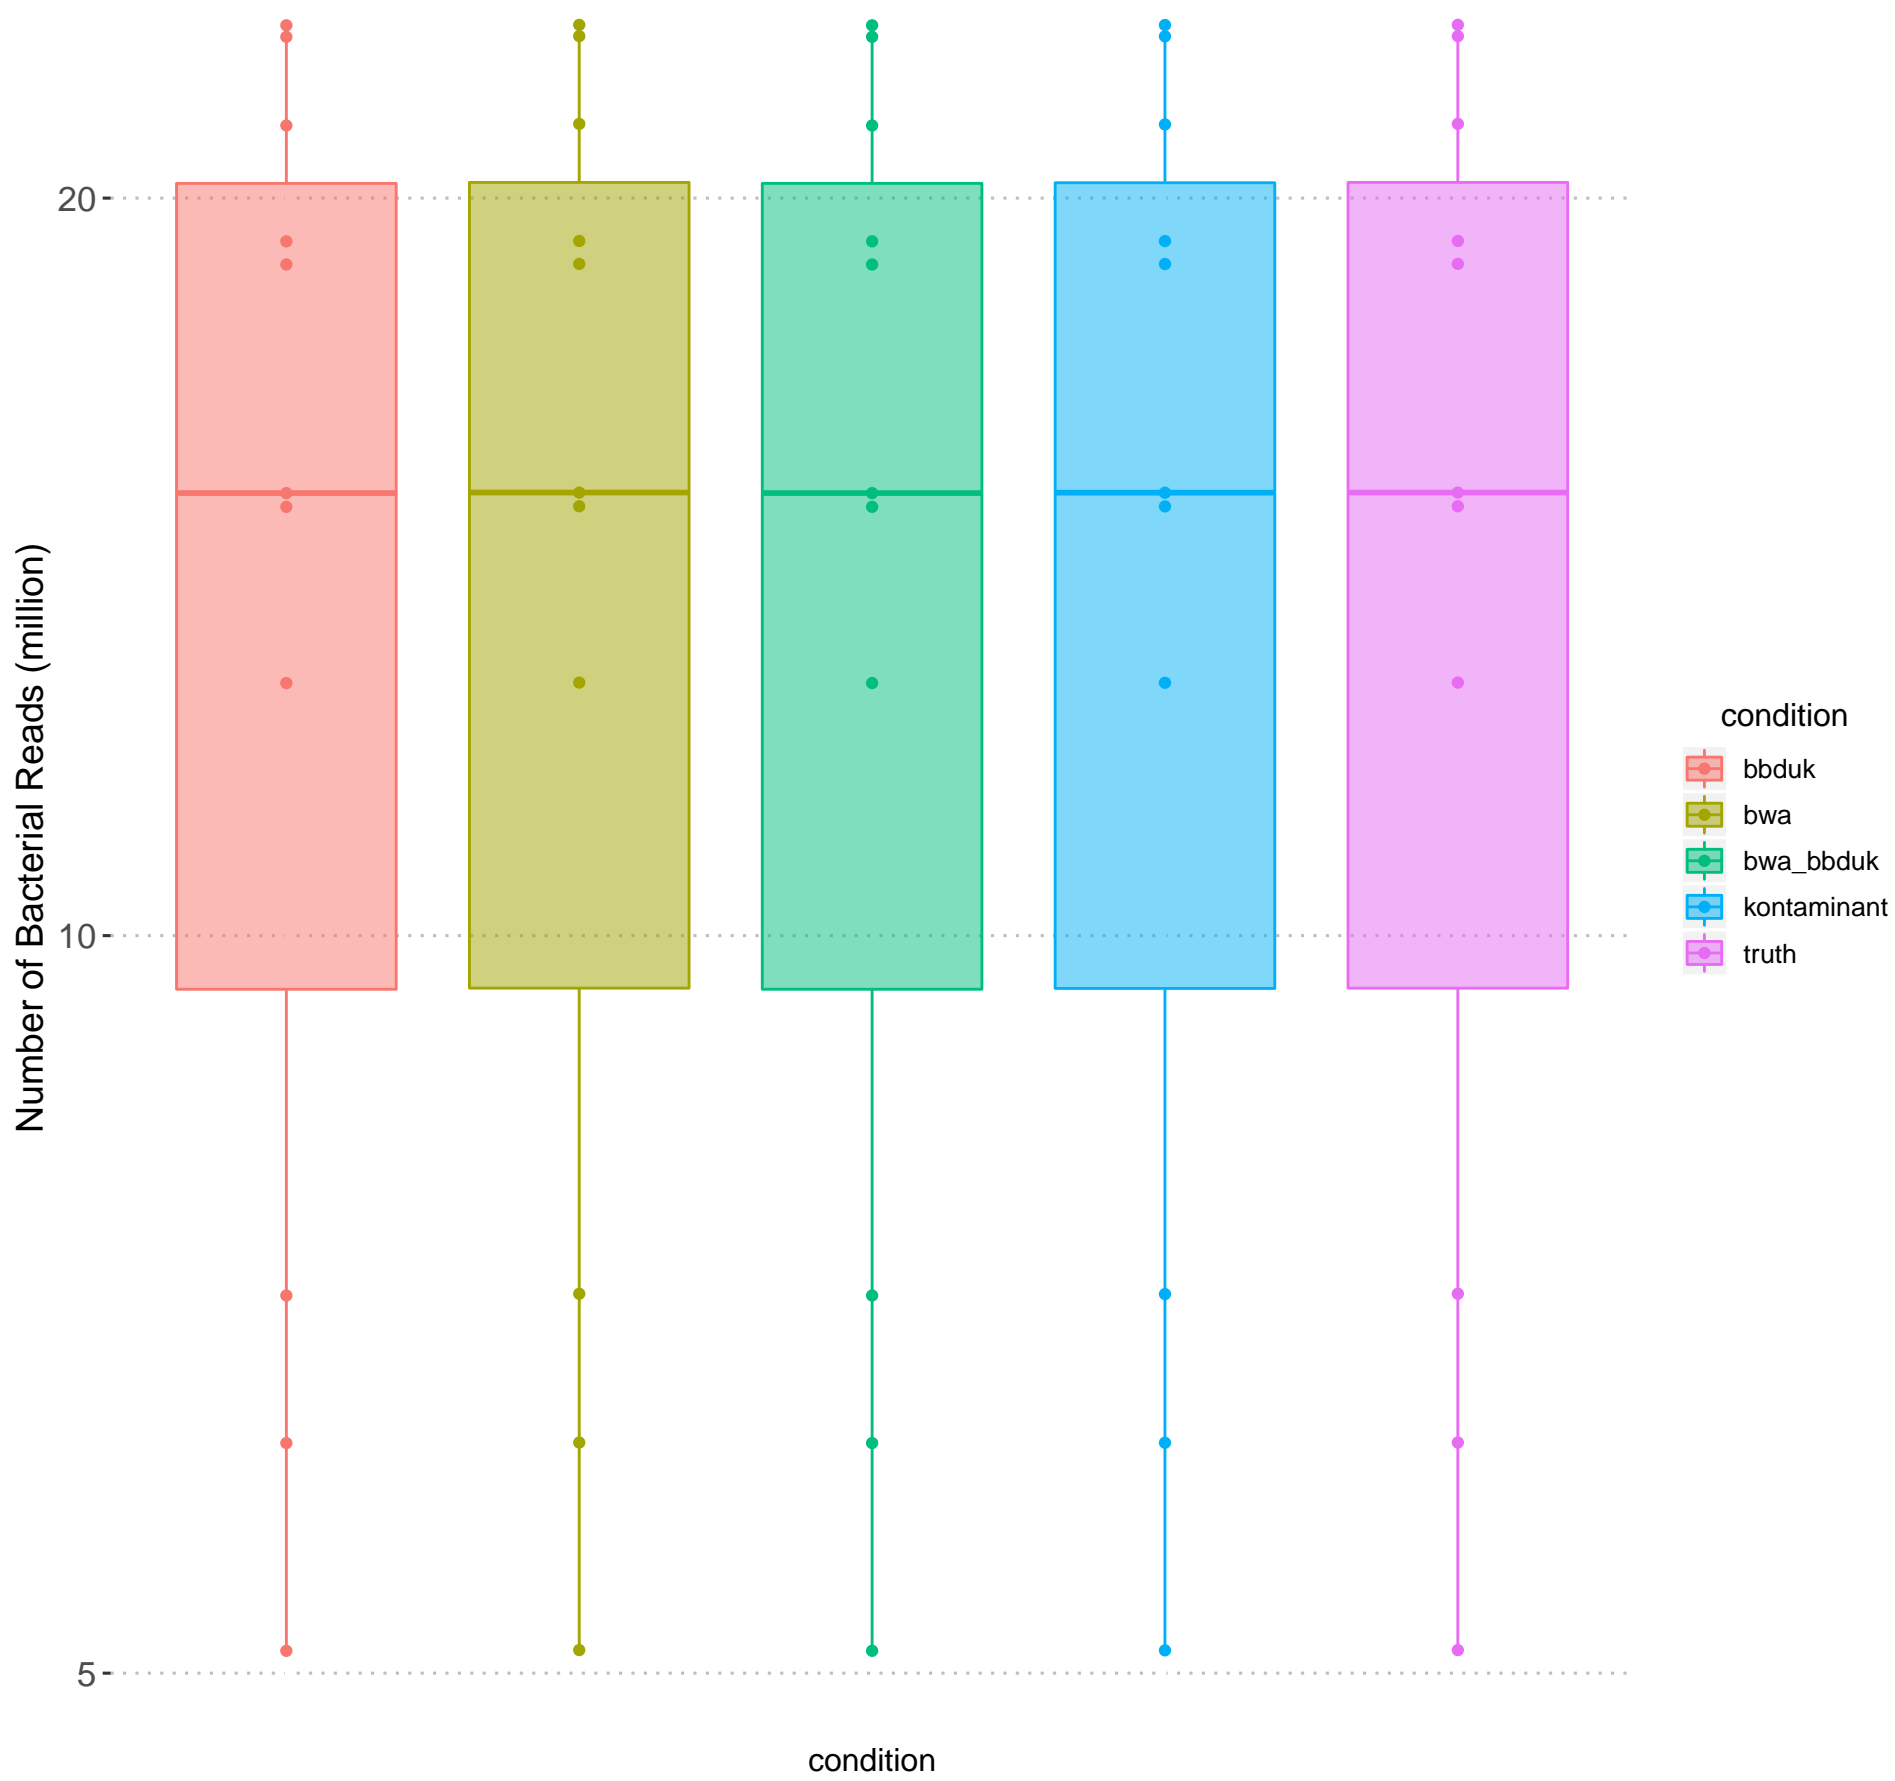

Supplement: 13059_2019_1819_MOESM2_ESM.pdf [file 13059_2019_1819_MOESM2_ESM.pdf]
