# Supplementary material for: SEPATH: benchmarking the search for pathogens in human tissue whole genome sequence data leads to template pipelines
Source: PubMed Central journal article supplement (PMC6805339; doi:10.1186/s13059-019-1819-8), 2019-10-22

# MetaSPAdes Contig Characteristics vs Kraken Detection Status

008v Dataset – 17693 Contigs – 0.2 Confidence – PPV = 0.826

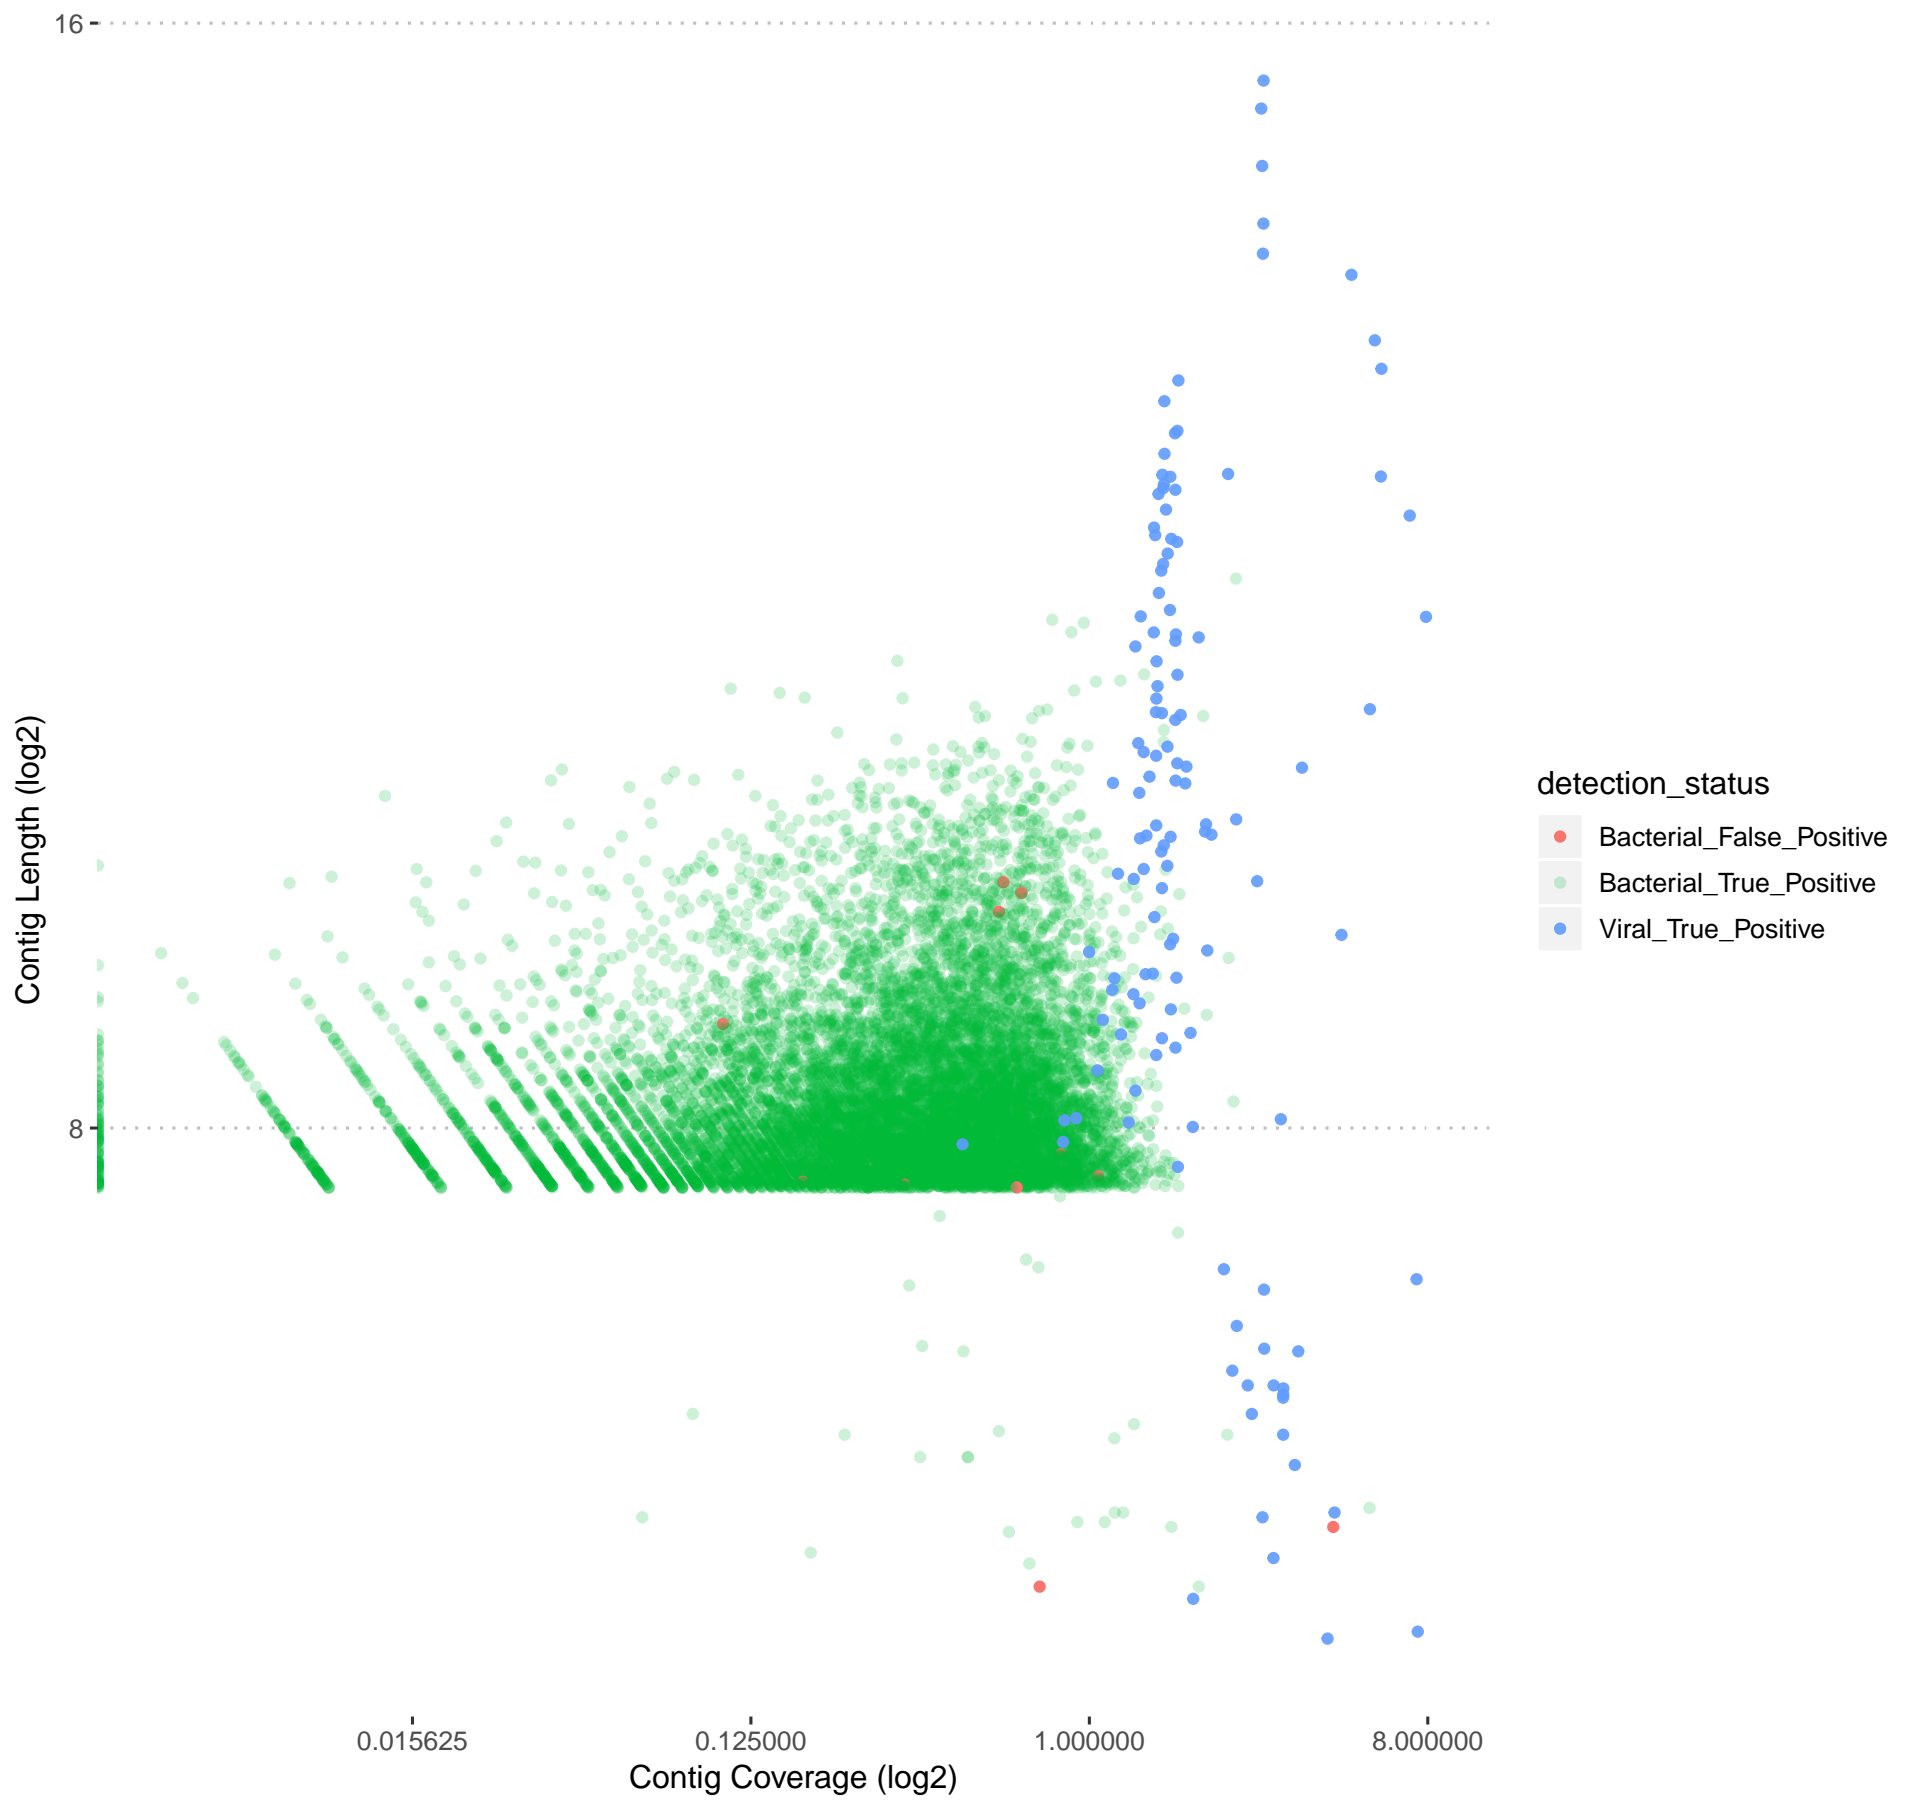

Supplement: 13059_2019_1819_MOESM7_ESM.pdf [file 13059_2019_1819_MOESM7_ESM.pdf]
